# Supplementary material for: Duodenal Anaerobutyricum soehngenii infusion stimulates GLP-1 production, ameliorates glycaemic control and beneficially shapes the duodenal transcriptome in metabolic syndrome subjects: a randomised double-blind placebo-controlled cross-over study
Source: HighWire-hosted journal article supplement (doi:10.1136/gutjnl-2020-323297), 2021-10-25

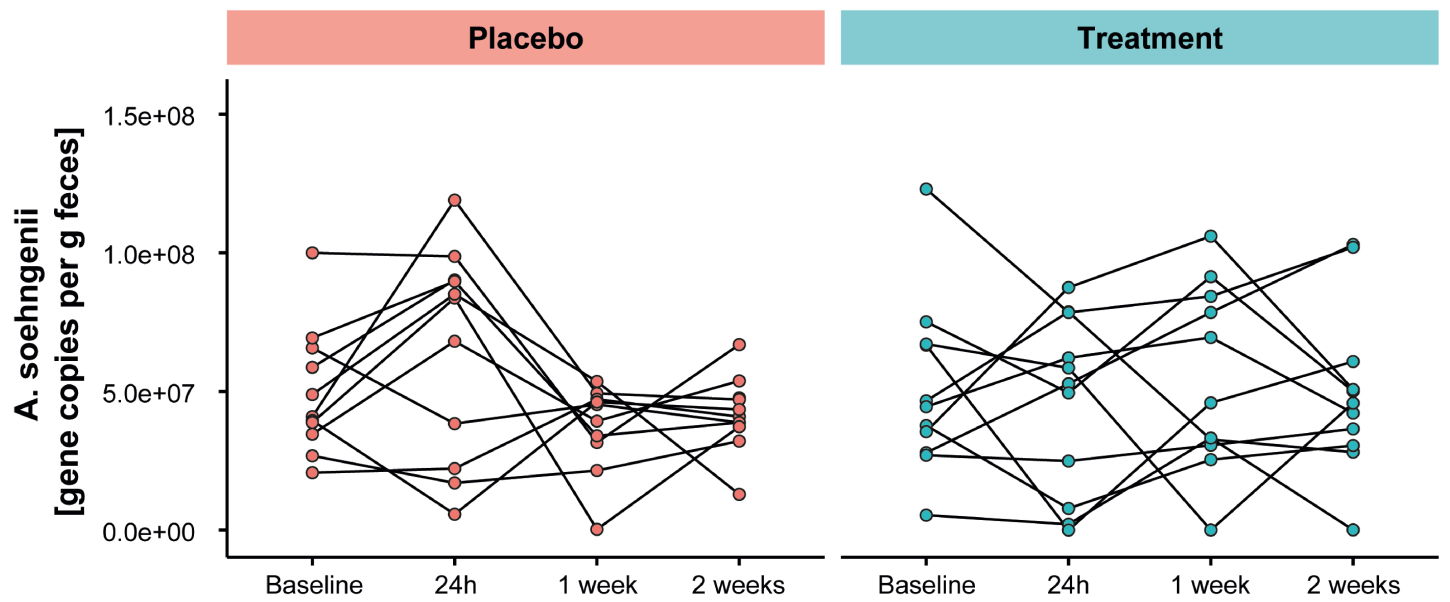

Supplement: gutjnl-2020-323297supp001_data_supplement.pdf [file gutjnl-2020-323297supp001_data_supplement.pdf]
